# Supplementary material for: Preliminary assessment of anti-α-Gal IgG and IgM levels in patients with patent Plasmodium vivax infection
Source: PubMed Central journal article supplement (PMC6611334; doi:10.1590/0074-02760190145), 2019-07-04
Supplement: 1678-8060-mioc-114-e190145-s.pdf [file 1678-8060-mioc-114-e190145-s.pdf]

TABLE  
ABO blood type and anti- $\alpha$ -Gal antibody responses  
for each patient with patent *Plasmodium vivax* infection

| Patient | Blood group | Anti- $\alpha$ -Gal IgG OD | Anti- $\alpha$ -Gal IgM OD |
|---------|-------------|----------------------------|----------------------------|
| 1       | O           | 0.18                       | 0.42                       |
| 2       | O           | 0.47                       | 0.20                       |
| 3       | O           | 0.37                       | 0.28                       |
| 4       | AB          | 0.24                       | 0.30                       |
| 5       | B           | 0.22                       | 0.19                       |
| 6       | O           | 0.36                       | 0.29                       |
| 7       | A           | 0.48                       | 0.57                       |
| 8       | A           | 0.48                       | 0.37                       |
| 9       | O           | 0.38                       | 0.25                       |
| 10      | B           | 0.25                       | 0.36                       |
| 11      | B           | 0.22                       | 0.20                       |
| 12      | O           | 0.20                       | 0.32                       |
| 13      | B           | 0.23                       | 0.18                       |
| 14      | AB          | 0.25                       | 0.19                       |
| 15      | O           | 0.23                       | 0.19                       |
| 16      | AB          | 0.31                       | 0.20                       |
| 17      | O           | 0.21                       | 0.21                       |
| 18      | B           | 0.22                       | 0.23                       |
| 19      | O           | 0.38                       | 0.23                       |
| 20      | O           | 0.20                       | 0.20                       |
| 21      | A           | 0.24                       | 0.23                       |
| 22      | O           | 0.24                       | 0.33                       |
| 23      | O           | 0.13                       | 0.22                       |
| 24      | O           | 0.10                       | 0.23                       |
| 25      | A           | 0.31                       | 0.28                       |
| 26      | A           | 0.23                       | 0.16                       |
| 27      | A           | 0.26                       | 0.23                       |
| 28      | O           | 0.22                       | 0.29                       |
| 29      | AB          | 0.10                       | 0.17                       |
| 30      | B           | 0.12                       | 0.20                       |
| 31      | B           | 0.08                       | 0.34                       |
| 32      | B           | 0.15                       | 0.24                       |
| 33      | B           | 0.32                       | 0.14                       |
| 34      | B           | 0.15                       | 0.23                       |
| 35      | AB          | 0.23                       | 0.22                       |
| 36      | B           | 0.45                       | 0.51                       |
| 37      | O           | 0.29                       | 0.27                       |
| 38      | O           | 0.34                       | 0.34                       |
| 39      | B           | 0.43                       | 0.58                       |
| 40      | O           | 0.32                       | 0.33                       |
| 41      | B           | 0.25                       | 0.39                       |
| 42      | O           | 0.63                       | 0.39                       |
| 43      | B           | 0.28                       | 0.54                       |
| 44      | A           | 0.35                       | 0.30                       |
| 45      | O           | 0.24                       | 0.38                       |
| 46      | B           | 0.20                       | 0.41                       |
| 47      | B           | 0.22                       | 0.49                       |
| 48      | B           | 0.28                       | 0.35                       |
| 49      | O           | 0.27                       | 0.34                       |

| Patient | Blood group | Anti- $\alpha$ -Gal IgG OD | Anti- $\alpha$ -Gal IgM OD |
|---------|-------------|----------------------------|----------------------------|
| 50      | O           | 0.19                       | 0.48                       |
| 51      | A           | 0.43                       | 0.38                       |
| 52      | O           | 0.22                       | 0.50                       |
| 53      | O           | 0.16                       | 0.57                       |
| 54      | O           | 0.19                       | 0.41                       |
| 55      | A           | 0.18                       | 0.41                       |
| 56      | B           | 0.25                       | 0.23                       |
| 57      | O           | 0.13                       | 0.49                       |
| 58      | O           | 0.20                       | 0.37                       |
| 59      | O           | 0.30                       | 0.34                       |
| 60      | B           | 0.34                       | 0.28                       |
| 61      | B           | 0.22                       | 0.39                       |
| 62      | B           | 0.23                       | 0.37                       |
| 63      | B           | 0.35                       | 0.25                       |
| 64      | AB          | 0.30                       | 0.18                       |
| 65      | A           | 0.48                       | 0.11                       |
| 66      | O           | 0.62                       | 0.97                       |
| 67      | A           | 0.48                       | 1.14                       |
| 68      | A           | 0.84                       | 0.86                       |
| 69      | O           | 0.31                       | 0.97                       |
| 70      | O           | 0.97                       | 1.07                       |
| 71      | O           | 0.17                       | 0.67                       |
| 72      | A           | 0.26                       | 0.53                       |
| 73      | B           | 0.12                       | 0.99                       |
| 74      | A           | 0.48                       | 0.77                       |
| 75      | O           | 0.67                       | 0.73                       |
| 76      | AB          | 0.34                       | 0.44                       |
| 77      | O           | 0.41                       | 0.79                       |
| 78      | B           | 0.62                       | 0.65                       |
| 79      | O           | 0.52                       | 0.79                       |
| 80      | A           | 0.21                       | 0.28                       |
| 81      | O           | 0.29                       | 0.36                       |
| 82      | O           | 0.32                       | 0.53                       |
| 83      | A           | 0.22                       | 0.47                       |
| 84      | B           | 0.20                       | 0.41                       |
| 85      | B           | 0.52                       | 0.32                       |
| 86      | A           | 0.27                       | 0.46                       |
| 87      | AB          | 0.35                       | 0.51                       |
| 88      | B           | 0.20                       | 0.43                       |
| 89      | A           | 0.35                       | 0.70                       |
| 90      | A           | 0.37                       | 0.61                       |
| 91      | B           | 0.33                       | 0.48                       |
| 92      | AB          | 0.17                       | 0.23                       |
| 93      | A           | 0.17                       | 0.54                       |
| 94      | B           | 0.15                       | 0.32                       |
| 95      | A           | 0.18                       | 0.48                       |
| 96      | O           | 0.29                       | 0.53                       |
| 97      | O           | 0.42                       | 0.48                       |
| 98      | B           | 0.43                       | 0.39                       |
| 99      | B           | 0.30                       | 0.26                       |

Levels of IgG and IgM were detected by enzyme linked immunosorbent assay (ELISA) and expressed as values of optical density (OD).
